# Supplementary material
Source: HighWire-hosted journal article supplement (http://www.jneurosci.org/highwire/filestream/599765/field_highwire_adjunct_files/0/Supplemental_Figures.pdf)
Supplement: Supplemental_Figures.pdf [file Supplemental_Figures.pdf]

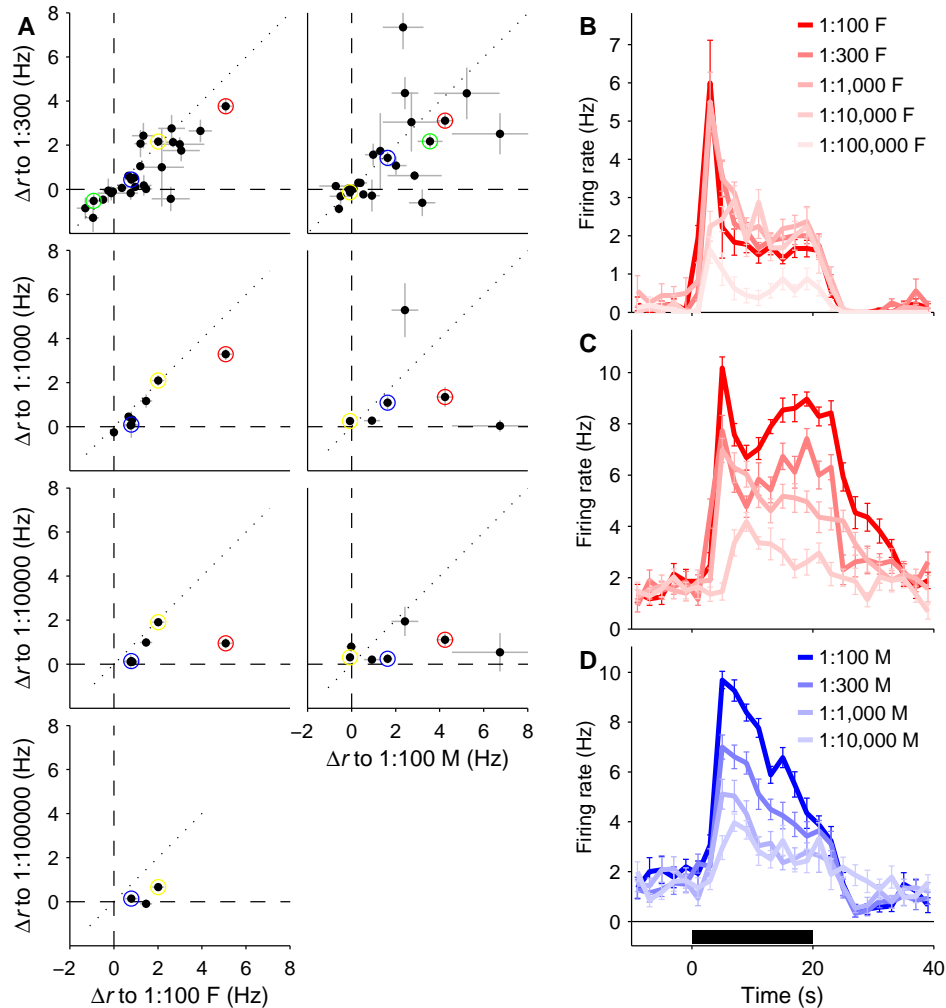

Figure S1: **Response magnitude declines with stimulus concentration.** (A)  $\overline{\Delta r}$ 's for units' responses to FMU and MMU at a variety of dilutions are plotted as a function of the units' responses to the highest concentration (1:100 dilution). Colored circles indicate cells which have been highlighted elsewhere in the text: the examples shown in panels B-D of this figure are indicated by yellow (B) and red (C-D) highlighting; the examples shown in panels F and G of Fig. 2 are indicated by green (F) and blue (G) highlighting. (B-D) PSTHs illustrating the responses of individual units to different stimulus concentrations.

Supplementary: *Inhibition shapes sex-selectivity in the mouse accessory olfactory bulb*

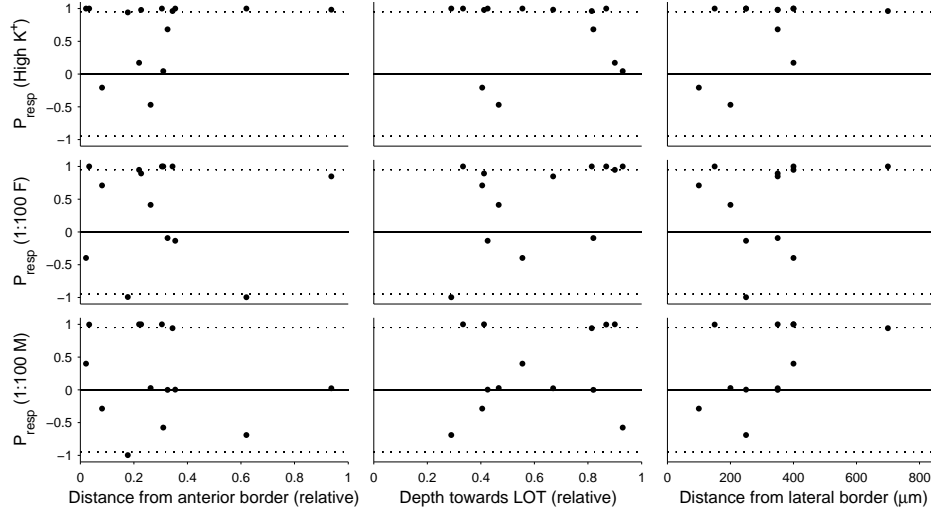

Figure S2: **Recorded AOB neurons are clustered in the anterior and lateral portions of the AOB.** Probability that a AOB neuron is responsive to High K<sup>+</sup> solution, FMU or MMU is plotted as a function of its three-dimensional spatial location within the AOB. Positive values are used in cases where  $\overline{\Delta r} > 0$ ; negative values indicate cases where  $\overline{\Delta r} < 0$ . Locations on the anterior-posterior and depth axes are normalized to the total length of these axes (see Methods); locations along the lateral-medial axis are given in  $\mu m$  from the lateral border of the AOB. Dashed lines indicate 95% probability. Twelve of the fourteen cells are in the anterior 35% of the AOB, and all but one are in the lateral half; no other significant clustering of response properties by spatial location was observed.
